# Supplementary material
Source: publisher site journal article supplement (https://www.kjim.org/upload/media/kjim-2025-143-Supplementary-Table-2.pdf)
Supplement: Supplementary file 1 [file kjim-2025-143-Supplementary-Table-2.pdf]

**Supplementary Table 2. Subgroup analysis of association between knee OA and the risk of cardiovascular events, MI, stroke, HF, and cardiovascular mortality**

|                                    | Events  | Duration  | IR <sup>a)</sup> | Model 4 <sup>b)</sup> , HR (95% CI) | <i>p</i> for interaction |
|------------------------------------|---------|-----------|------------------|-------------------------------------|--------------------------|
| CVD (MI or stroke or HF)           |         |           |                  |                                     |                          |
| Age < 65 yr                        |         |           |                  |                                     |                          |
| Knee OA (-)                        | 68,942  | 5,129,009 | 13.44            | 1.00 (ref.)                         | 0.409                    |
| Knee OA (+)                        | 2,988   | 198,815   | 15.03            | 1.10 (1.06–1.14)                    |                          |
| Age ≥ 65 yr                        |         |           |                  |                                     |                          |
| Knee OA (-)                        | 53,408  | 1,580,740 | 33.79            | 1.00 (ref.)                         | 1.12 (1.09–1.16)         |
| Knee OA (+)                        | 4,406   | 119,215   | 36.96            | 1.12 (1.09–1.16)                    |                          |
| Sex, male                          |         |           |                  |                                     |                          |
| Knee OA (-)                        | 88,795  | 4,597,128 | 19.32            | 1.00 (ref.)                         | 0.497                    |
| Knee OA (+)                        | 3,748   | 140,726   | 26.63            | 1.13 (1.09–1.16)                    |                          |
| Sex, female                        |         |           |                  |                                     |                          |
| Knee OA (-)                        | 33,555  | 2,112,621 | 15.88            | 1.00 (ref.)                         | 1.11 (1.07–1.15)         |
| Knee OA (+)                        | 3,646   | 177,304   | 20.56            | 1.11 (1.07–1.15)                    |                          |
| Insulin use (-)                    |         |           |                  |                                     |                          |
| Knee OA (-)                        | 104,932 | 6,182,164 | 16.97            | 1.00 (ref.)                         | 0.006                    |
| Knee OA (+)                        | 6,196   | 285,902   | 21.67            | 1.13 (1.10–1.16)                    |                          |
| Insulin use (+)                    |         |           |                  |                                     |                          |
| Knee OA (-)                        | 17,418  | 527,585   | 33.01            | 1.00 (ref.)                         | 1.04 (0.98–1.10)         |
| Knee OA (+)                        | 1,198   | 32,128    | 37.29            | 1.04 (0.98–1.10)                    |                          |
| Oral antidiabetic drug < 3 classes |         |           |                  |                                     |                          |
| Knee OA (-)                        | 97,160  | 5,630,153 | 17.26            | 1.00 (ref.)                         | 0.563                    |
| Knee OA (+)                        | 5,673   | 260,016   | 21.82            | 1.11 (1.08–1.14)                    |                          |
| Oral antidiabetic drug ≥ 3 classes |         |           |                  |                                     |                          |
| Knee OA (-)                        | 25,190  | 1,079,596 | 23.33            | 1.00 (ref.)                         | 1.13 (1.08–1.19)         |
| Knee OA (+)                        | 1,721   | 58,015    | 29.66            | 1.13 (1.08–1.19)                    |                          |
| DM duration < 5 yr                 |         |           |                  |                                     |                          |
| Knee OA (-)                        | 71,480  | 4,573,340 | 15.63            | 1.00 (ref.)                         | 0.001                    |
| Knee OA (+)                        | 4,267   | 207,415   | 20.57            | 1.16 (1.12–1.19)                    |                          |
| DM duration ≥ 5 yr                 |         |           |                  |                                     |                          |
| Knee OA (-)                        | 50,870  | 2,136,409 | 23.81            | 1.00 (ref.)                         | 1.07 (1.03–1.11)         |
| Knee OA (+)                        | 3,127   | 110,615   | 28.27            | 1.07 (1.03–1.11)                    |                          |
| MI                                 |         |           |                  |                                     |                          |
| Age < 65 yr                        |         |           |                  |                                     |                          |
| Knee OA (-)                        | 16,283  | 5,275,945 | 3.09             | 1.00 (ref.)                         | 0.898                    |
| Knee OA (+)                        | 652     | 205,556   | 3.17             | 1.05 (0.97–1.14)                    |                          |
| Age ≥ 65 yr                        |         |           |                  |                                     |                          |
| Knee OA (-)                        | 10,589  | 1,693,689 | 6.25             | 1.00 (ref.)                         | 1.06 (0.99–1.14)         |
| Knee OA (+)                        | 815     | 129,409   | 6.30             | 1.06 (0.99–1.14)                    |                          |
| Sex, male                          |         |           |                  |                                     |                          |
| Knee OA (-)                        | 20,140  | 4,780,523 | 4.21             | 1.00 (ref.)                         | 0.736                    |
| Knee OA (+)                        | 772     | 149,070   | 5.18             | 1.05 (0.98–1.13)                    |                          |

**Supplementary Table 2. Continued**

|                                    | Events | Duration  | IR <sup>a)</sup> | Model 4 <sup>b)</sup> , HR (95% CI) | <i>p</i> for interaction |
|------------------------------------|--------|-----------|------------------|-------------------------------------|--------------------------|
| Sex, female                        |        |           |                  |                                     |                          |
| Knee OA (-)                        | 6,732  | 2,189,111 | 3.08             | 1.00 (ref.)                         |                          |
| Knee OA (+)                        | 695    | 185,894   | 3.74             | 1.07 (0.99–1.16)                    |                          |
| Insulin use (-)                    |        |           |                  |                                     |                          |
| Knee OA (-)                        | 22,925 | 6,406,223 | 3.58             | 1.00 (ref.)                         | 0.907                    |
| Knee OA (+)                        | 1,205  | 300,340   | 4.01             | 1.06 (1.00–1.12)                    |                          |
| Insulin use (+)                    |        |           |                  |                                     |                          |
| Knee OA (-)                        | 3,947  | 563,411   | 7.01             | 1.00 (ref.)                         |                          |
| Knee OA (+)                        | 262    | 34,625    | 7.57             | 1.05 (0.93–1.19)                    |                          |
| Oral antidiabetic drug < 3 classes |        |           |                  |                                     |                          |
| Knee OA (-)                        | 21,116 | 5,835,562 | 3.62             | 1.00 (ref.)                         | 0.088                    |
| Knee OA (+)                        | 1,087  | 273,165   | 3.98             | 1.03 (0.97–1.10)                    |                          |
| Oral antidiabetic drug ≥ 3 classes |        |           |                  |                                     |                          |
| Knee OA (-)                        | 5,756  | 1,134,072 | 5.08             | 1.00 (ref.)                         |                          |
| Knee OA (+)                        | 380    | 61,799    | 6.15             | 1.15 (1.03–1.27)                    |                          |
| DM duration < 5 yr                 |        |           |                  |                                     |                          |
| Knee OA (-)                        | 15,466 | 4,723,981 | 3.27             | 1.00 (ref.)                         | 0.461                    |
| Knee OA (+)                        | 818    | 217,304   | 3.76             | 1.08 (1.00–1.16)                    |                          |
| DM duration ≥ 5 yr                 |        |           |                  |                                     |                          |
| Knee OA (-)                        | 11,406 | 2,245,654 | 5.08             | 1.00 (ref.)                         |                          |
| Knee OA (+)                        | 649    | 117,661   | 5.52             | 1.04 (0.96–1.12)                    |                          |
| Stroke                             |        |           |                  |                                     |                          |
| Age < 65 yr                        |        |           |                  |                                     |                          |
| Knee OA (-)                        | 33,012 | 5,211,100 | 6.33             | 1.00 (ref.)                         | 0.408                    |
| Knee OA (+)                        | 1,436  | 202,486   | 7.09             | 1.11 (1.05–1.17)                    |                          |
| Age ≥ 65 yr                        |        |           |                  |                                     |                          |
| Knee OA (-)                        | 28,392 | 1,630,878 | 17.41            | 1.00 (ref.)                         |                          |
| Knee OA (+)                        | 2,380  | 123,754   | 19.23            | 1.14 (1.09–1.19)                    |                          |
| Sex, male                          |        |           |                  |                                     |                          |
| Knee OA (-)                        | 44,362 | 4,693,401 | 9.45             | 1.00 (ref.)                         | 0.206                    |
| Knee OA (+)                        | 1,956  | 144,676   | 13.52            | 1.15 (1.10–1.20)                    |                          |
| Sex, female                        |        |           |                  |                                     |                          |
| Knee OA (-)                        | 17,042 | 2,148,577 | 7.93             | 1.00 (ref.)                         |                          |
| Knee OA (+)                        | 1,860  | 181,564   | 10.24            | 1.1 (1.05–1.16)                     |                          |
| Insulin use (-)                    |        |           |                  |                                     |                          |
| Knee OA (-)                        | 53,289 | 6,294,516 | 8.47             | 1.00 (ref.)                         | 0.203                    |
| Knee OA (+)                        | 3,228  | 292,748   | 11.03            | 1.14 (1.10–1.18)                    |                          |
| Insulin use (+)                    |        |           |                  |                                     |                          |
| Knee OA (-)                        | 8,115  | 547,462   | 14.82            | 1.00 (ref.)                         |                          |
| Knee OA (+)                        | 588    | 33,492    | 17.56            | 1.07 (0.99–1.17)                    |                          |
| Oral antidiabetic drug < 3 classes |        |           |                  |                                     |                          |
| Knee OA (-)                        | 48,684 | 5,734,476 | 8.49             | 1.00 (ref.)                         | 0.313                    |

Supplementary Table 2. Continued

|                                    | Events | Duration  | IR <sup>a)</sup> | Model 4 <sup>b)</sup> , HR (95% CI) | <i>p</i> for interaction |
|------------------------------------|--------|-----------|------------------|-------------------------------------|--------------------------|
| Knee OA (+)                        | 2,962  | 266,219   | 11.13            | 1.14 (1.10–1.18)                    |                          |
| Oral antidiabetic drug ≥ 3 classes |        |           |                  |                                     |                          |
| Knee OA (-)                        | 12,720 | 1,107,502 | 11.49            | 1.00 (ref.)                         |                          |
| Knee OA (+)                        | 854    | 60,022    | 14.23            | 1.09 (1.02–1.17)                    |                          |
| DM duration < 5 yr                 |        |           |                  |                                     |                          |
| Knee OA (-)                        | 35,723 | 4,650,741 | 7.68             | 1.00 (ref.)                         | 0.004                    |
| Knee OA (+)                        | 2,215  | 212,120   | 10.44            | 1.18 (1.13–1.23)                    |                          |
| DM duration ≥ 5 yr                 |        |           |                  |                                     |                          |
| Knee OA (-)                        | 25,681 | 2,191,237 | 11.72            | 1.00 (ref.)                         |                          |
| Knee OA (+)                        | 1,601  | 114,120   | 14.03            | 1.07 (1.01–1.12)                    |                          |
| HF                                 |        |           |                  |                                     |                          |
| Age < 65 yr                        |        |           |                  |                                     |                          |
| Knee OA (-)                        | 30,861 | 5,263,530 | 5.86             | 1.00 (ref.)                         | 0.324                    |
| Knee OA (+)                        | 1,398  | 204,653   | 6.83             | 1.13 (1.07–1.2)                     |                          |
| Age ≥ 65 yr                        |        |           |                  |                                     |                          |
| Knee OA (-)                        | 25,987 | 1,674,975 | 15.51            | 1.00 (ref.)                         |                          |
| Knee OA (+)                        | 2,131  | 127,589   | 16.70            | 1.09 (1.05–1.14)                    |                          |
| Sex, male                          |        |           |                  |                                     |                          |
| Knee OA (-)                        | 41,285 | 4,761,375 | 8.67             | 1.00 (ref.)                         | 0.092                    |
| Knee OA (+)                        | 1,831  | 147,714   | 12.40            | 1.14 (1.09–1.19)                    |                          |
| Sex, female                        |        |           |                  |                                     |                          |
| Knee OA (-)                        | 15,563 | 2,177,130 | 7.15             | 1.00 (ref.)                         |                          |
| Knee OA (+)                        | 1,698  | 184,528   | 9.20             | 1.07 (1.02–1.13)                    |                          |
| Insulin use (-)                    |        |           |                  |                                     |                          |
| Knee OA (-)                        | 47,402 | 6,383,297 | 7.43             | 1.00 (ref.)                         | 0.001                    |
| Knee OA (+)                        | 2,902  | 298,140   | 9.73             | 1.14 (1.10–1.19)                    |                          |
| Insulin use (+)                    |        |           |                  |                                     |                          |
| Knee OA (-)                        | 9,446  | 555,208   | 17.01            | 1.00 (ref.)                         |                          |
| Knee OA (+)                        | 627    | 34,102    | 18.39            | 0.98 (0.90–1.06)                    |                          |
| Oral antidiabetic drug < 3 classes |        |           |                  |                                     |                          |
| Knee OA (-)                        | 44,822 | 5,811,439 | 7.71             | 1.00 (ref.)                         | 0.554                    |
| Knee OA (+)                        | 2,686  | 271,063   | 9.91             | 1.10 (1.06–1.15)                    |                          |
| Oral antidiabetic drug ≥ 3 classes |        |           |                  |                                     |                          |
| Knee OA (-)                        | 12,026 | 1,127,067 | 10.67            | 1.00 (ref.)                         |                          |
| Knee OA (+)                        | 843    | 61,180    | 13.78            | 1.13 (1.05–1.21)                    |                          |
| DM duration < 5 yr                 |        |           |                  |                                     |                          |
| Knee OA (-)                        | 32,254 | 4,708,415 | 6.85             | 1.00 (ref.)                         | 0.019                    |
| Knee OA (+)                        | 1,985  | 215,763   | 9.20             | 1.15 (1.10–1.20)                    |                          |
| DM duration ≥ 5 yr                 |        |           |                  |                                     |                          |
| Knee OA (-)                        | 24,594 | 2,230,090 | 11.03            | 1.00 (ref.)                         |                          |
| Knee OA (+)                        | 1,544  | 116,480   | 13.26            | 1.06 (1.01–1.12)                    |                          |
| Cardiovascular mortality           |        |           |                  |                                     |                          |

**Supplementary Table 2. Continued**

|                                    | Events | Duration  | IR <sup>a)</sup> | Model 4 <sup>b)</sup> , HR (95% CI) | <i>p</i> for interaction |
|------------------------------------|--------|-----------|------------------|-------------------------------------|--------------------------|
| Age < 65 yr                        |        |           |                  |                                     |                          |
| Knee OA (-)                        | 5,060  | 5,321,017 | 0.95             | 1.00 (ref.)                         | 0.245                    |
| Knee OA (+)                        | 173    | 207,406   | 0.83             | 0.91 (0.78–1.05)                    |                          |
| Age ≥ 65 yr                        |        |           |                  |                                     |                          |
| Knee OA (-)                        | 8,398  | 1,718,103 | 4.89             | 1.00 (ref.)                         | 0.726                    |
| Knee OA (+)                        | 592    | 131,461   | 4.50             | 1.00 (0.92–1.09)                    |                          |
| Sex, male                          |        |           |                  |                                     |                          |
| Knee OA (-)                        | 10,236 | 4,833,193 | 2.12             | 1.00 (ref.)                         | 0.726                    |
| Knee OA (+)                        | 432    | 151,026   | 2.86             | 0.97 (0.88–1.07)                    |                          |
| Sex, female                        |        |           |                  |                                     |                          |
| Knee OA (-)                        | 3,222  | 2,205,928 | 1.46             | 1.00 (ref.)                         | 0.800                    |
| Knee OA (+)                        | 333    | 187,841   | 1.77             | 0.99 (0.89–1.11)                    |                          |
| Insulin use (-)                    |        |           |                  |                                     |                          |
| Knee OA (-)                        | 11,399 | 6,466,553 | 1.76             | 1.00 (ref.)                         | 0.800                    |
| Knee OA (+)                        | 623    | 303,596   | 2.05             | 0.97 (0.90–1.06)                    |                          |
| Insulin use (+)                    |        |           |                  |                                     |                          |
| Knee OA (-)                        | 2,059  | 572,568   | 3.60             | 1.00 (ref.)                         | 0.115                    |
| Knee OA (+)                        | 142    | 35,270    | 4.03             | 1.00 (0.84–1.18)                    |                          |
| Oral antidiabetic drug < 3 classes |        |           |                  |                                     |                          |
| Knee OA (-)                        | 10,735 | 5,890,223 | 1.82             | 1.00 (ref.)                         | 0.115                    |
| Knee OA (+)                        | 575    | 276,058   | 2.08             | 0.95 (0.87–1.03)                    |                          |
| Oral antidiabetic drug ≥ 3 classes |        |           |                  |                                     |                          |
| Knee OA (-)                        | 2,723  | 1,148,897 | 2.37             | 1.00 (ref.)                         | 0.294                    |
| Knee OA (+)                        | 190    | 62,809    | 3.03             | 1.09 (0.94–1.26)                    |                          |
| DM duration < 5 yr                 |        |           |                  |                                     |                          |
| Knee OA (-)                        | 7,668  | 4,764,974 | 1.61             | 1.00 (ref.)                         | 0.294                    |
| Knee OA (+)                        | 409    | 219,495   | 1.86             | 0.94 (0.85–1.04)                    |                          |
| DM duration ≥ 5 yr                 |        |           |                  |                                     |                          |
| Knee OA (-)                        | 5,790  | 2,274,147 | 2.55             | 1.00 (ref.)                         | 1.02 (0.92–1.14)         |
| Knee OA (+)                        | 356    | 119,372   | 2.98             | 1.02 (0.92–1.14)                    |                          |

OA, osteoarthritis; MI, myocardial infarction; HF, heart failure; IR, incidence rate; HR, hazard ratio; CI, confidence interval; CVD, cardiovascular disease; DM, diabetes mellitus; BMI, body mass index; eGFR, estimated glomerular filtration rate.

<sup>a)</sup>Per 1,000 person-years.

<sup>b)</sup>The HR was adjusted for age, sex, income, hypertension, dyslipidemia, smoking, drinking, exercise, BMI, eGFR, insulin use, number of oral antidiabetic medications, and duration of diabetes.
